# Supplementary material for: Uncertainty budget in snow thickness and snow water equivalent estimation using GPR and TDR techniques
Source: Copernicus journal article supplement (doi:10.5194/tc-2016-267), 2016-12-01
Supplement: Supplementary file [file tc-2016-267-AC1-supplement.pdf]

**Interactive comment on “Uncertainty budget in snow thickness and snow water equivalent estimation using GPR and TDR techniques” by Federico Di Paolo et al.**

We would like to apologize with the Associated Editor and the reviewer 1 about Fig.4 which, as highlighted by the referee, is wrong because the X-scale is incorrect due to a mistake in the code when it generated the picture. This mistake has been cause of confusion. The following Figure is the correct one and, as it can be seen, is in agreement with Figure 6 and the overall results presented in the original manuscript.

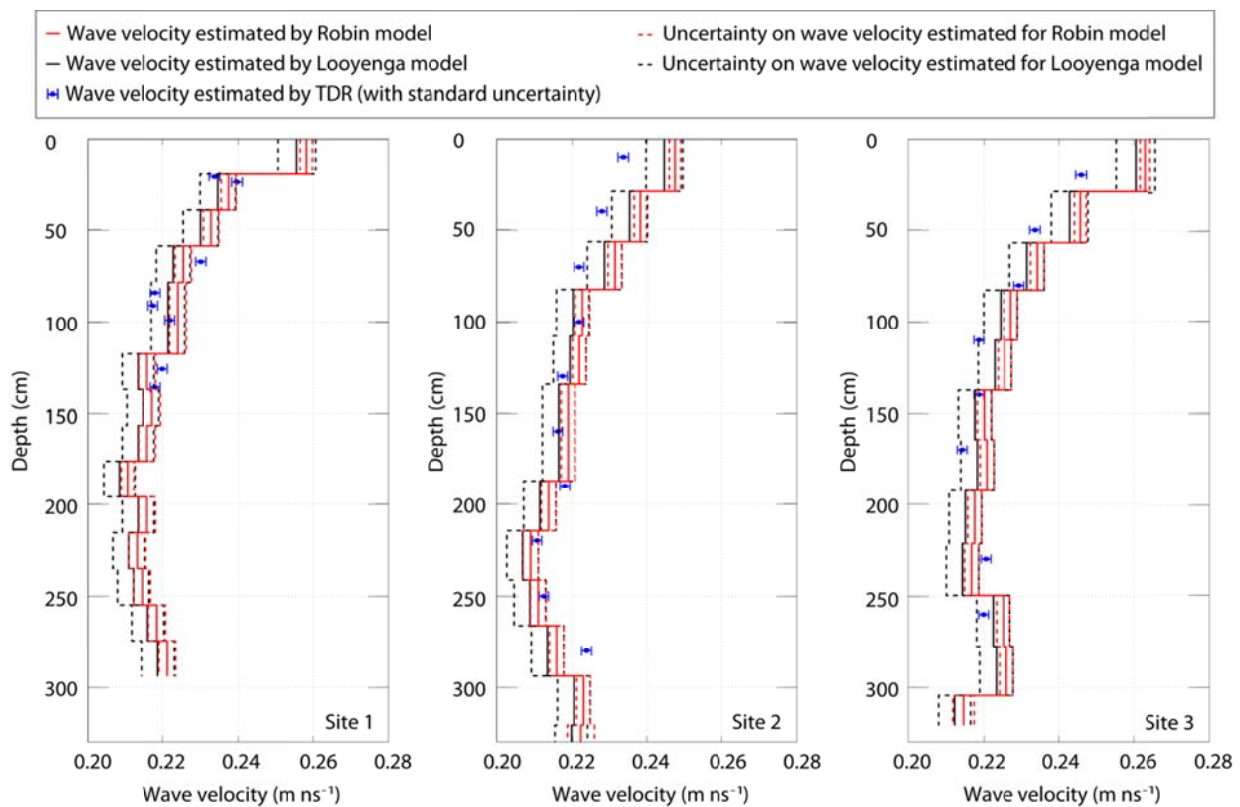

**Fig.4**
